# Supplementary material for: Multiple lineages of Streptomyces produce antimicrobials within passalid beetle galleries across eastern North America
Source: eLife journal article supplement (doi:10.7554/elife.65091), 2021-05-03
Supplement: supp2 [file elife-65091-supp2-v1.pdf]

[M+H]<sup>+</sup>  
Mass error: 1.7 ppm

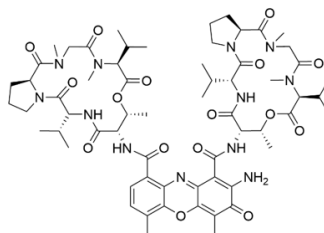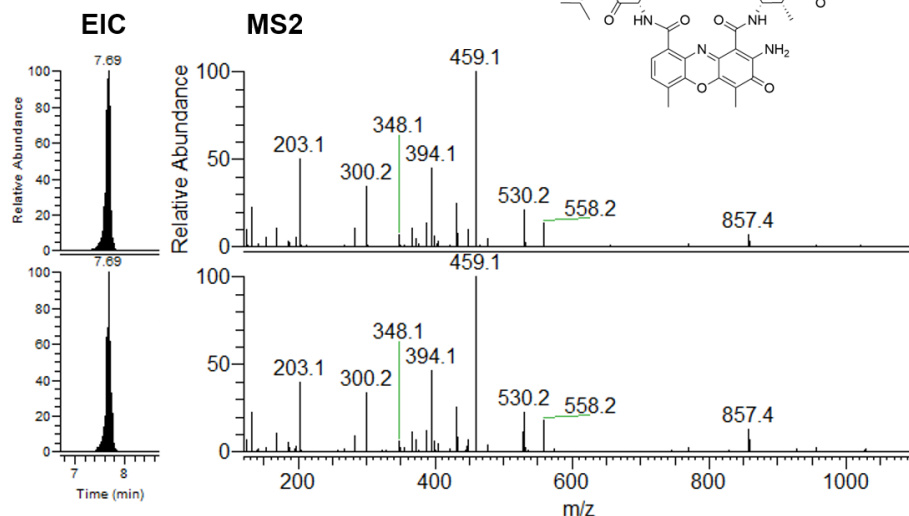

### Standard

NL: 1.36E6  
021620\_Std\_ActD#3128-3223  
RT: 7.63-7.72 AV: 2 F: FTMS + p  
ESI d Full ms2  
1255.6366@hcd30.00  
[50.0000-1300.0000]

### Strain P333

NL: 6.63E6  
011319\_EtAcMS2\_P333#3913-  
4025 RT: 7.67-7.77 AV: 2 F:  
FTMS + p ESI d Full ms2  
1255.6366@hcd30.00  
[50.0000-1300.0000]

**(2) Actinomycin X2**

[M+H]<sup>+</sup>  
Mass error: 2.2 ppm

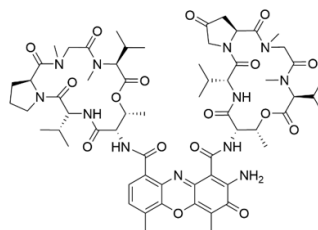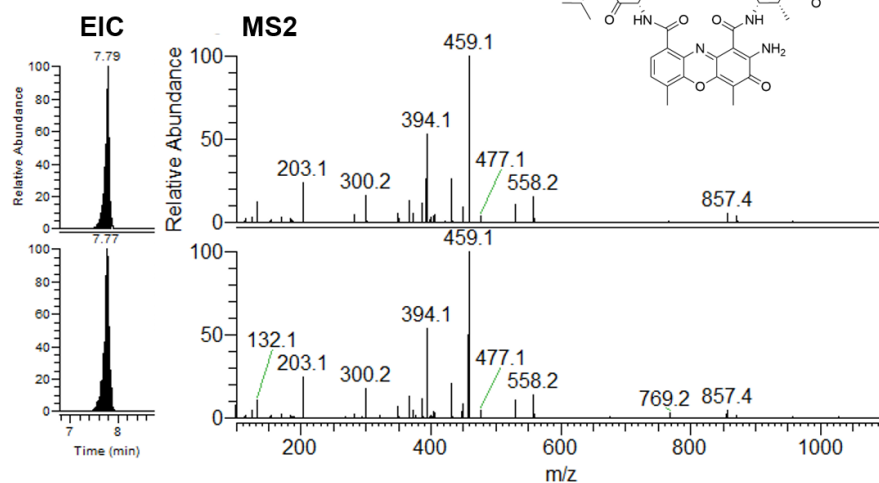

### Standard

NL: 1.61E6  
052120\_Std\_ActinomycinX2#3188-  
3253 RT: 7.74-7.82 AV: 2 F: FTMS  
+ p ESI d Full ms2  
1269.6119@hcd30.00  
[50.0000-1315.0000]

### Strain P333

NL: 1.90E7  
011319\_EtAcMS2\_P333#3969-  
4052 RT: 7.74-7.84 AV: 2 F: FTMS  
+ p ESI d Full ms2  
1269.6119@hcd30.00  
[50.0000-1315.0000]

### (3) STA-21

$[M+H]^+$

Mass error: 1.6 ppm

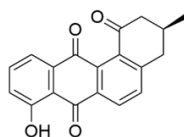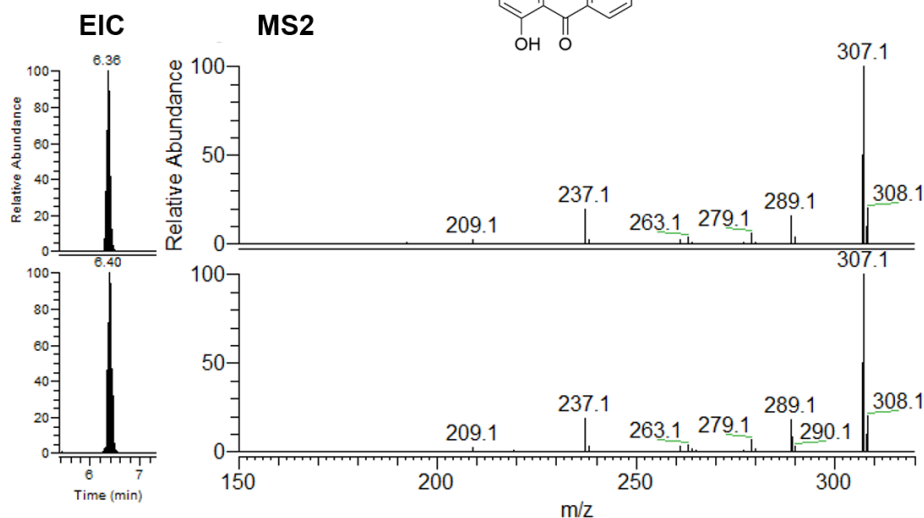

#### Standard

NL: 1.76E7  
032019\_Std\_STA-21#2724  
RT: 6.38 AV: 1 F: FTMS + p  
ESI d Full ms2  
307.0964@hcd30.00  
[50.0000-330.0000]

#### Strain P239

NL: 1.58E6  
011319\_EtAcMS2\_P239#2963  
RT: 6.36 AV: 1 F: FTMS + p  
ESI d Full ms2  
307.0964@hcd30.00  
[50.0000-330.0000]

### (4) Rubiginone B2

$[M+H]^+$

Mass error: 2.2 ppm

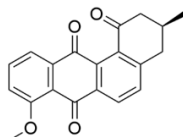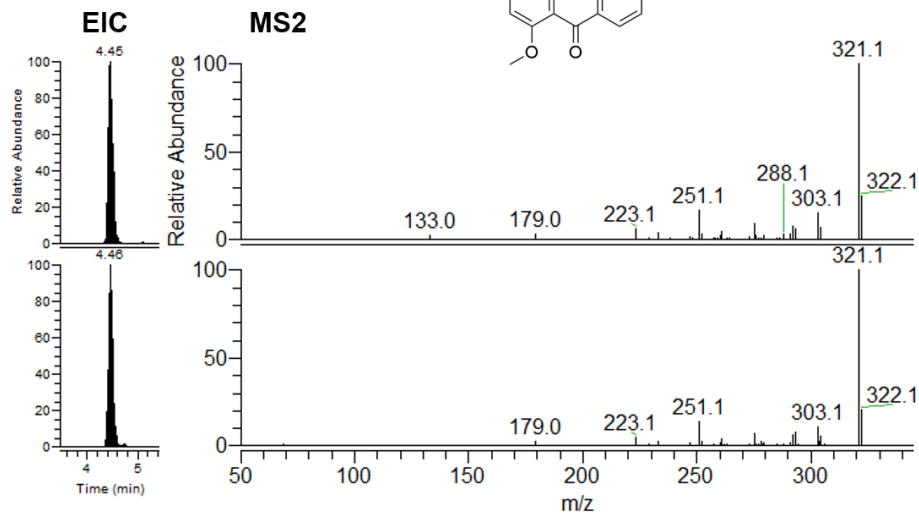

#### Standard

NL: 1.36E8  
021620\_Std\_Rubiginone#1814  
RT: 4.43 AV: 1 T: FTMS + p ESI  
d Full ms2 321.1118@hcd30.00  
[50.0000-345.0000]

#### Strain P239

NL: 1.75E7  
011319\_EtAcMS2\_P239#2151  
RT: 4.45 AV: 1 F: FTMS + p ESI  
d Full ms2 321.1125@hcd30.00  
[50.0000-345.0000]

[M+H]<sup>+</sup>  
Mass error: 2.1 ppm

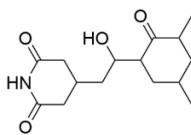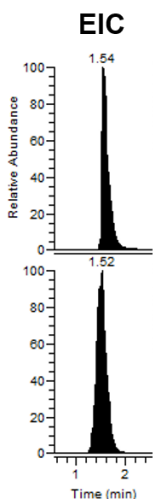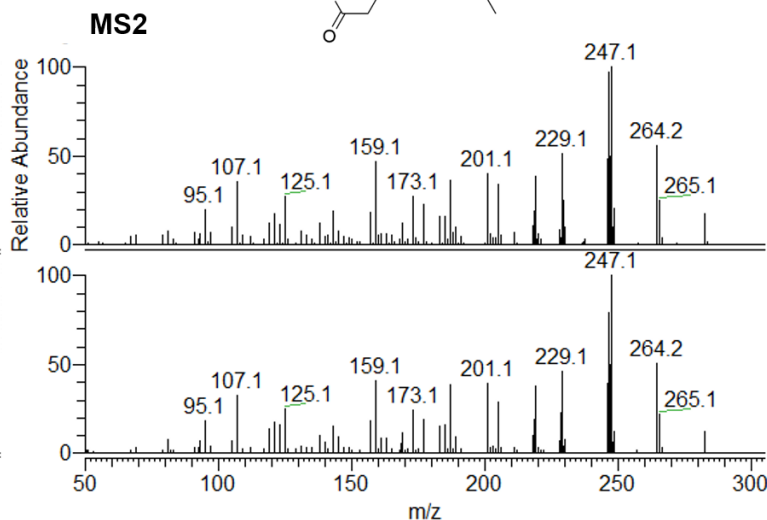

## Standard

NL: 1.34E8  
012419\_cycloheximide-#802  
RT: 1.62 AV: 1 F: FTMS + p  
ESI d Full ms2  
282.1703@hcd30.00  
[50.0000-305.0000]

### Strain P263

NL: 3.05E7  
011319\_EtAcMS2\_P263#816  
RT: 1.58 AV: 1 F: FTMS + p  
ESI d Full ms2  
282.1703@hcd30.00  
[50.0000-305.0000]

## (6) Nonactin

[M+Na]<sup>+</sup>  
Mass error: 2.6 ppm

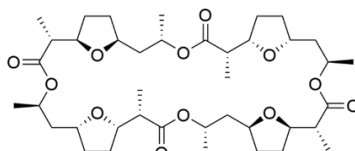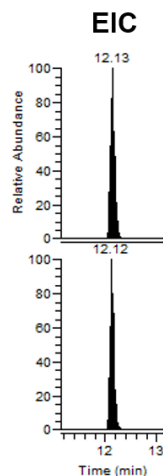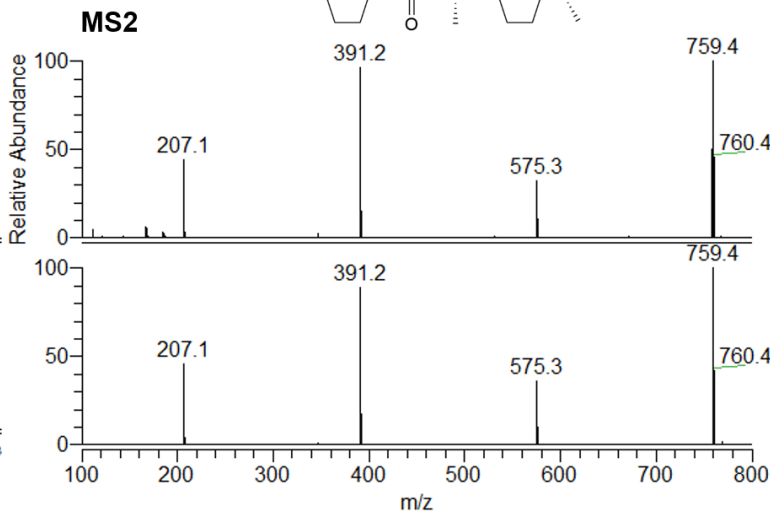

## Standard

NL: 1.18E7  
092520\_Nactins\_Std#5285 RT:  
12.08 AV: 1 F: FTMS + p ESI d  
Full ms2 759.4280@hcd30.00  
4 [50.0000-795.0000]

### Strain P327

NL: 4.89E6  
011319\_EtAcMS2\_P327#5713  
RT: 12.08 AV: 1 F: FTMS + p  
ESI d Full ms2  
759.4280@hcd30.00  
[50.0000-795.0000]

[M+Na]<sup>+</sup>  
Mass error: 3.2 ppm

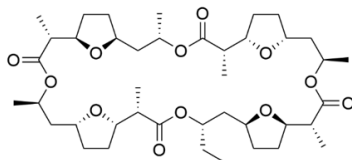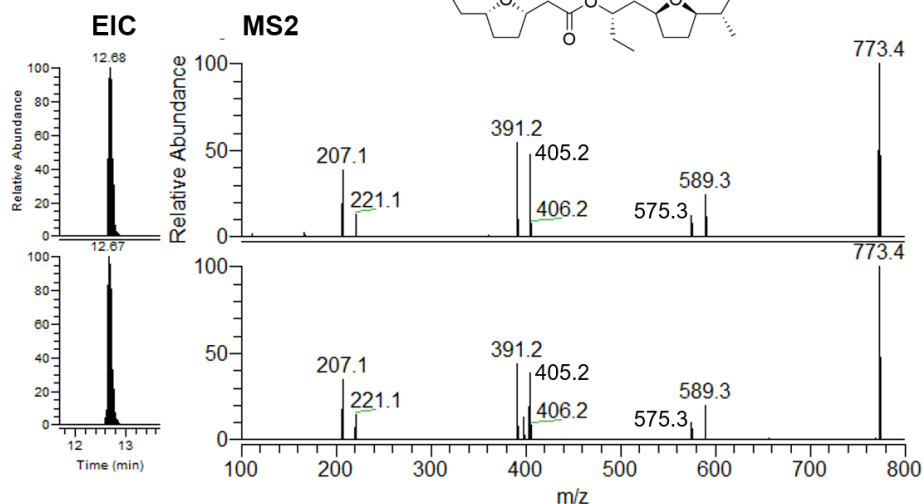

Standard  
NL: 6.49E6  
092520\_Nactins\_Std#1-9209 RT:  
12.51-13.08 AV: 13 F: FTMS + p  
ESI d Full ms2  
773.4428@hcd30.00  
[50.0000-810.0000]

NL: 1.02E7  
011319\_EtAcMS2\_P327#1-  
11110 RT: 5.31-13.37 AV: 13 F:  
FTMS + p ESI d Full ms2  
773.4440@hcd30.00  
[50.0000-810.0000]

[M+Na]<sup>+</sup>  
Mass error: 3.4 ppm

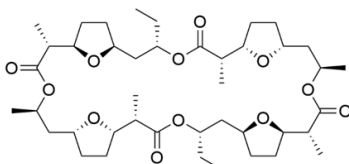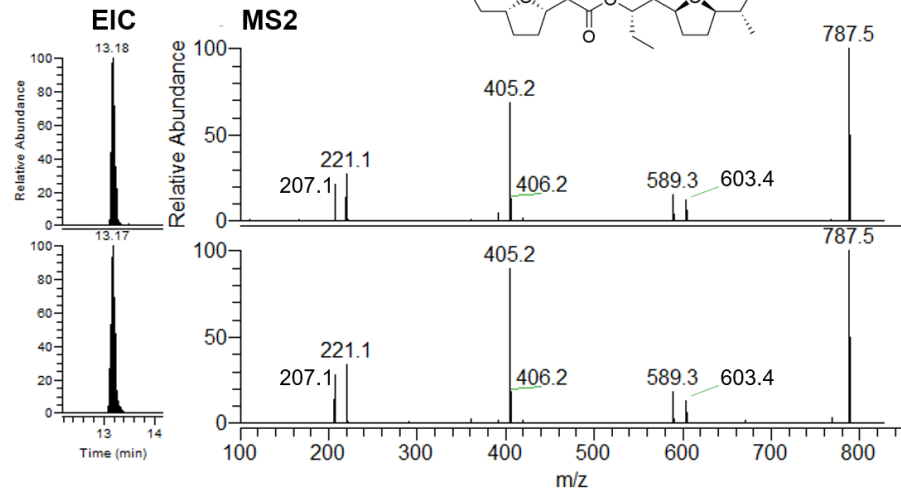

NL: 6.05E6  
092520\_Nactins\_Std#1-9209 RT:  
13.03-13.54 AV: 13 F: FTMS + p  
ESI d Full ms2  
787.4589@hcd30.00  
[50.0000-820.0000]

NL: 1.33E7  
011319\_EtAcMS2\_P327#1-  
11110 RT: 9.30-14.95 AV: 18 F:  
FTMS + p ESI d Full ms2  
787.4597@hcd30.00  
[50.0000-820.0000]

[M+Na]<sup>+</sup>  
Mass error: 2.5 ppm

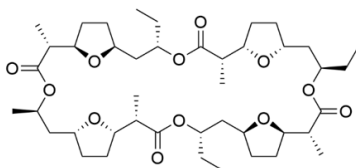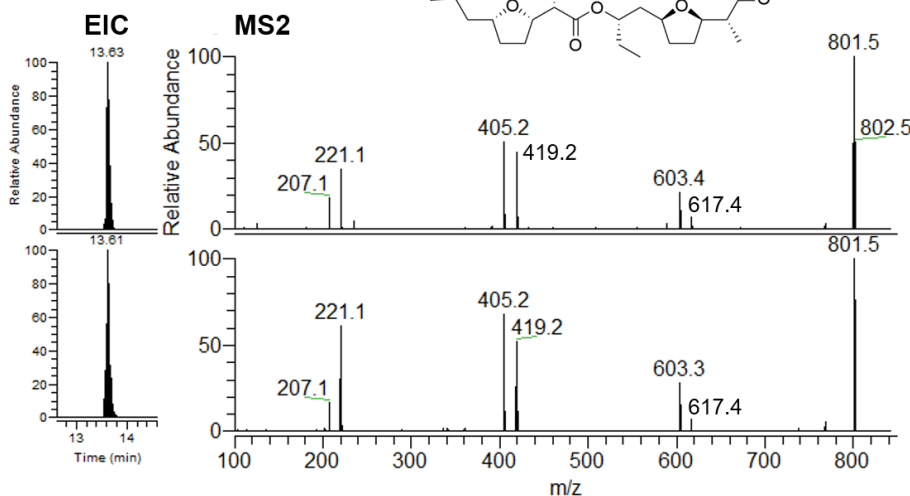

NL: 1.18E6  
092520\_Nactins\_Std#1-9209 RT:  
13.45-13.78 AV: 8 F: FTMS + p  
ESI d Full ms2  
801.4750@hcd30.00  
[50.0000-835.0000]

NL: 8.69E6  
011319\_EtAcMS2\_P327#1-  
11110 RT: 13.44-14.10 AV: 9 F:  
FTMS + p ESI d Full ms2  
801.4780@hcd30.00  
[50.0000-835.0000]

[M+Na]<sup>+</sup>  
Mass error: 1.7 ppm

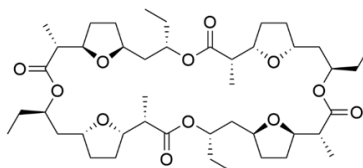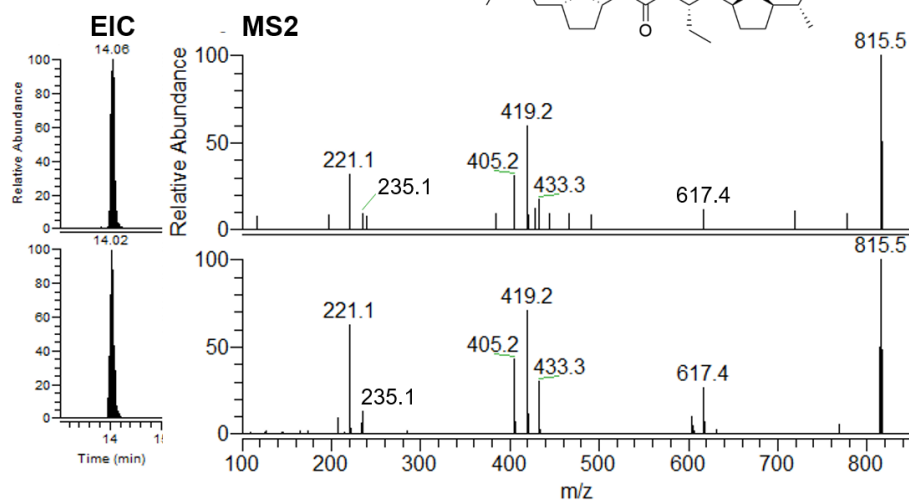

092520\_Nactins\_Std#6273 RT:  
14.00 AV: 1 F: FTMS + p ESI d  
Full ms2 815.4909@hcd30.00  
[50.0000-850.0000]

NL: 1.28E6  
011319\_EtAcMS2\_P327#1-  
11110 RT: 13.97-14.15 AV: 3 F:  
FTMS + p ESI d Full ms2  
815.4900@hcd30.00  
[50.0000-850.0000]

**(11) Filipin I** $[M+Na]^+$ 

Mass error: 1.1 ppm

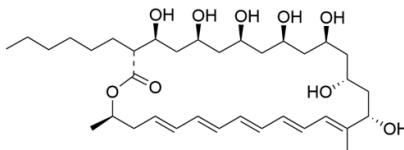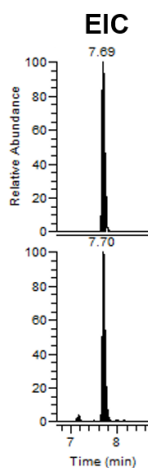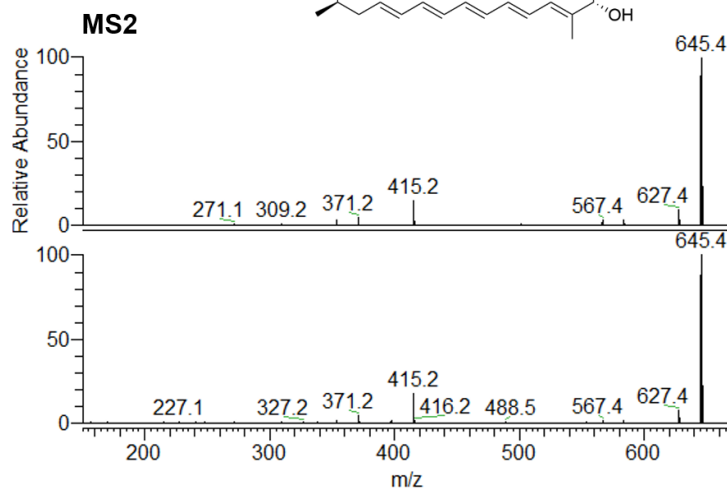**Standard**

NL: 4.28E5  
052120\_Std\_FilipinComplex#3604-3691 RT: 7.64-7.73 AV: 2 F: FTMS + p ESI d Full ms2  
645.3947@hcd30.00  
[50.0000-675.0000]

**Strain P181**

NL: 1.29E5  
021320\_EtAc\_P181#3522-3606 RT: 7.65-7.74 AV: 2 F: FTMS + p ESI d Full ms2  
645.3947@hcd30.00  
[50.0000-675.0000]

**(12) Filipin II** $[M+Na]^+$ 

Mass error: 1.7 ppm

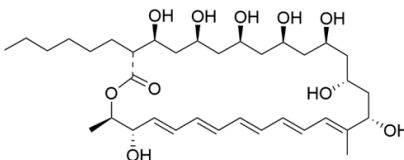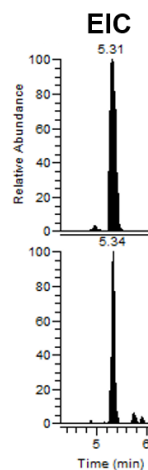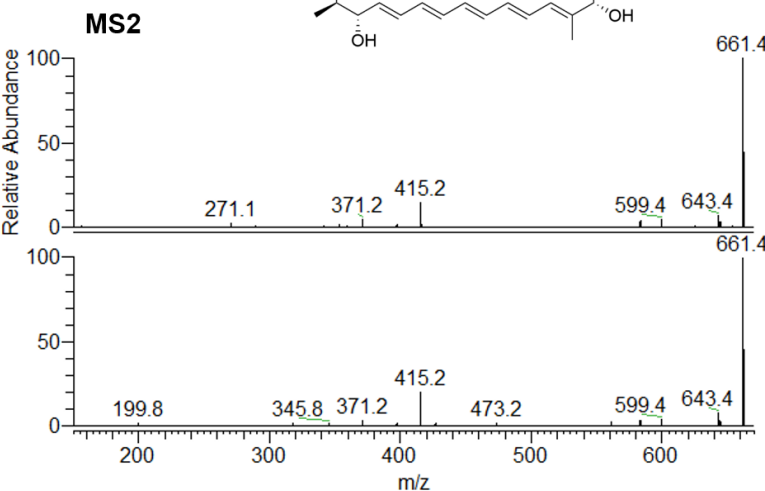**Standard**

NL: 5.50E6  
052120\_Std\_FilipinComplex#2590 RT: 5.32 AV: 1 F: FTMS + p ESI d Full ms2  
661.3928@hcd30.00  
[50.0000-695.0000]

**Strain P181**

NL: 1.30E5  
021320\_EtAc\_P181#2491 RT: 5.36 AV: 1 F: FTMS + p ESI d Full ms2  
661.3928@hcd30.00  
[50.0000-695.0000]

**(13) Filipin III**  
[M+Na]<sup>+</sup>  
Mass error: 0.3 ppm

 $[M+Na]^+$ 

Mass error: 0.3 ppm

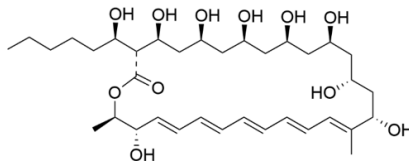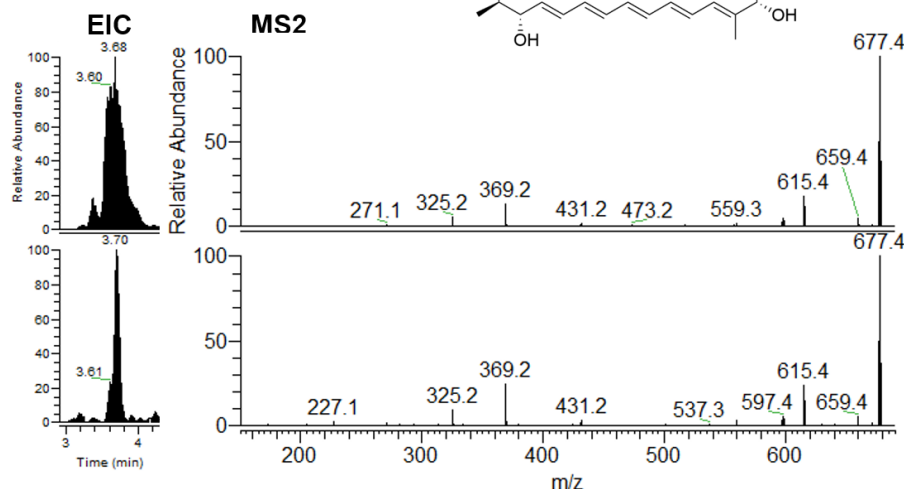

## Standard

NL: 4.50E6

052120\_Std\_FilipinComplex#1738-  
1911 RT: 3.63-3.81 AV: 3 F: FTMS  
+ p ESI d Full ms2  
677.3857@hcd30.00  
[50.0000-710.0000]

### Strain P181

NL: 1.01E5

021320\_EtAc\_P181#1741-1904  
RT: 3.66-3.90 AV: 3 F: FTMS + p  
ESI d Full ms2 677.3857@hcd30.00  
[50.0000-710.0000]

**(18) Antimycin A**  
[M+H]<sup>+</sup>  
Mass error: 0.0 ppm

$[M+H]^+$

Mass error: 0.0 ppm

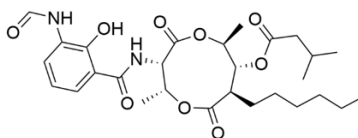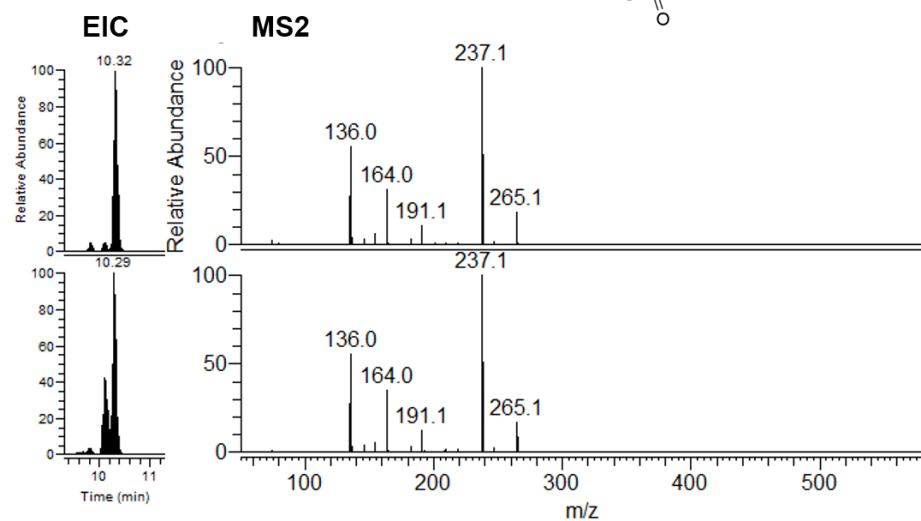

## Standard

NL: 1.01E7

021720\_Std\_Antimycin#4334  
RT: 10.36 AV: 1 T: FTMS + p  
ESI d Full ms2  
549.2809@hcd30.00  
[50.0000-580.0000]

### Strain P203

NL: 2.35E6

011319\_EtAcMS2\_P203#4928  
RT: 10.32 AV: 1 F: FTMS + p  
ESI d Full ms2  
549.2809@hcd30.00  
[50.0000-580.0000]

**(19) Nocardamine**

$[M+H]^+$

Mass error: 0.8 ppm

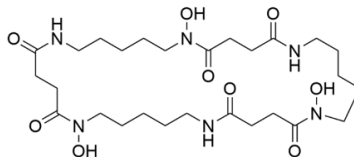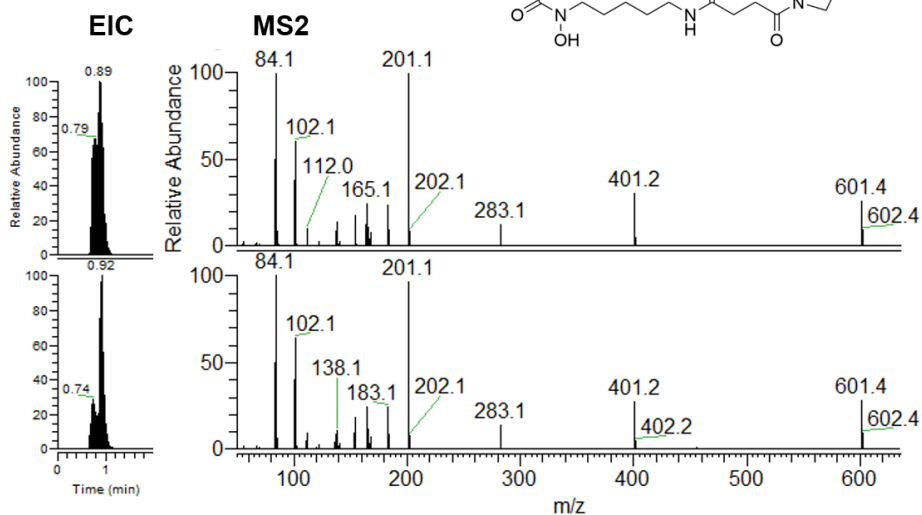

## Standard

NL: 9.53E5

022520\_Std\_Nocardamine#207-  
442 RT: 0.70-0.96 AV: 4 F: FTMS  
+ p ESI d Full ms2  
601.3552@hcd30.00  
[50.0000-630.0000]

### Strain P307

NL: 9.62E5

011319\_EtAcMS2\_P307#207-465  
RT: 0.70-0.98 AV: 4 F: FTMS + p  
ESI d Full ms2  
601.3552@hcd30.00  
[50.0000-630.0000]

**(20) Bafilomycin A1**

$[M+Na]^+$

Mass error: 1.7 ppm

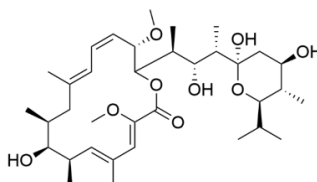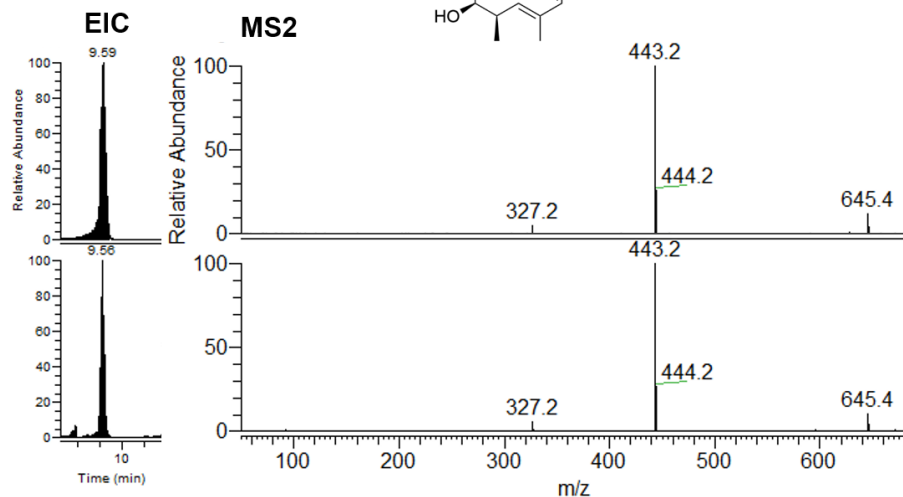

## Standard

NI - 6.33F6

100219\_BafilomycinA1#3952-  
4066 RT: 9.54-9.63 AV: 2 F:  
FTMS + c ESI d Full ms2  
645.3981@hcd30.00  
[50.0000-675.0000]

### Strain P059

NL: 5.72E5

021320\_EtAc\_P059#4397-4507  
RT: 9.51-9.60 AV: 2 F: FTMS + p  
ESI d Full ms2  
645.3964@hcd30.00  
[50.0000-675.0000]



**(21) Bafilomycin B1** $[M+Na]^+$ 

Mass error: 2.0 ppm

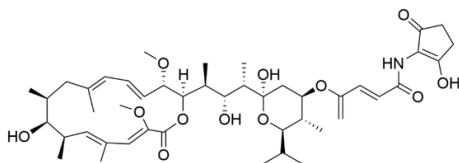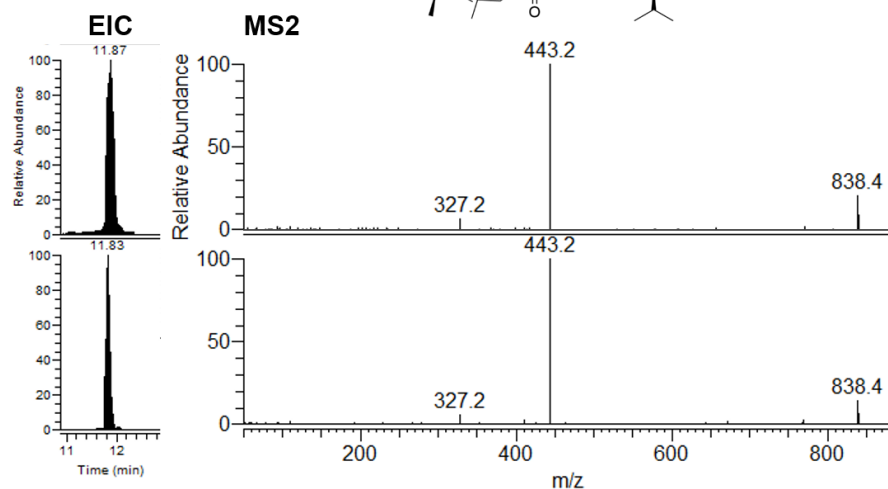**Standard**

NL: 3.63E6

100219\_BafilomycinB1#5271-5387

RT: 11.79-11.89 AV: 2 F: FTMS +

c ESI d Full ms2

838.4347@hcd30.00

[50.0000-875.0000]

**Strain P059**

NL: 6.24E6

021320\_EtAc\_P059#5640-5752

RT: 11.85-11.94 AV: 2 F: FTMS + p

ESI d Full ms2

838.4344@hcd30.00

[50.0000-875.0000]

**(22) Novobiocin** $[M+H]^+$ 

Mass error: 2.4 ppm

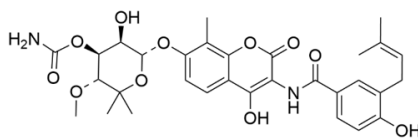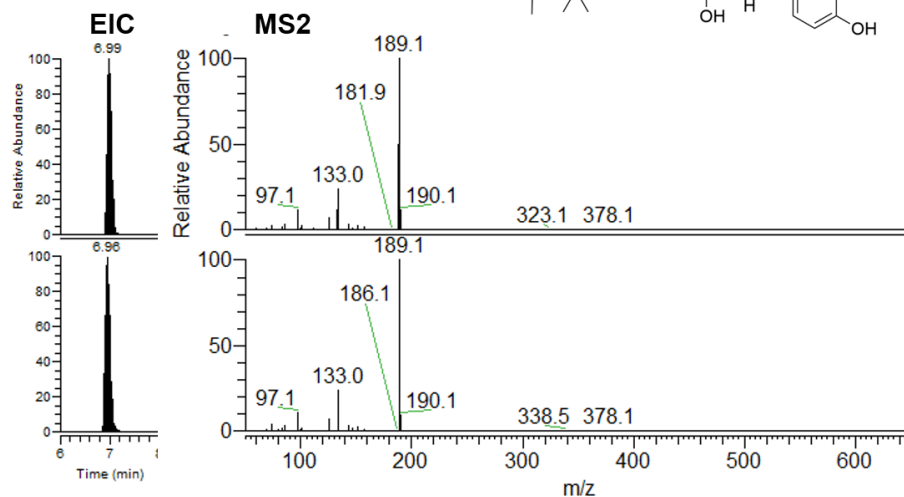**Standard**

NL: 1.51E7

021720\_Std\_Novobiocin#2811-

2913 RT: 6.94-7.03 AV: 2 F:

FTMS + p ESI d Full ms2

613.2393@hcd30.00

[50.0000-645.0000]

**Strain P049**

NL: 3.49E7

011319\_EtAcMS2\_P049#3500-

3614 RT: 6.96-7.08 AV: 2 F:

FTMS + p ESI d Full ms2

613.2391@hcd30.00

[50.0000-645.0000]

**(24) Piericidin A**

$[M+H]^+$

Mass error: 2.6 ppm

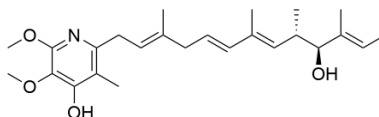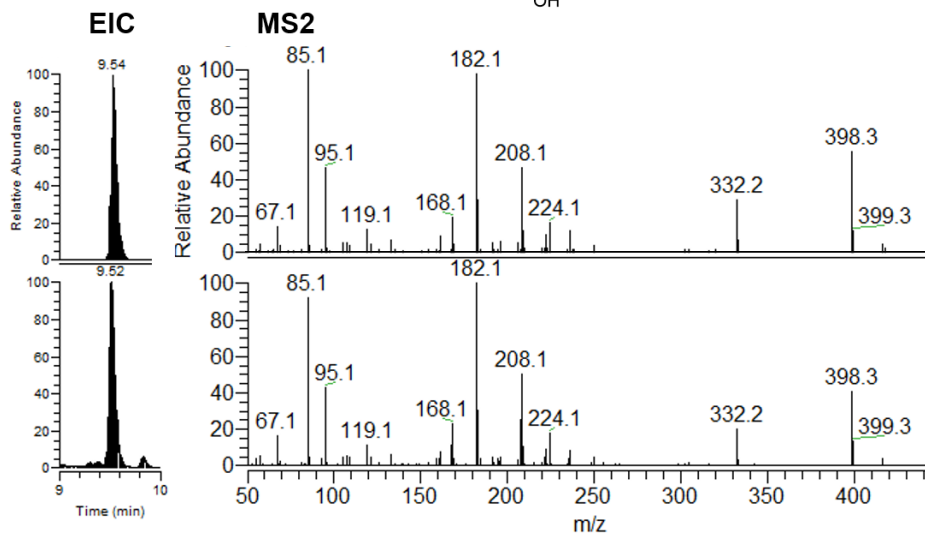

## Standard

NL: 2.04E7

100219\_Piericidin#4783 RT:  
9.53 AV: 1 F: FTMS + c ESI d  
Full ms2 416.2798@hcd30.00  
[50.0000-445.0000]

### Strain P190

NL: 2.29E6

021420 EtAc P190#4166

RT: 9.51<sup>-</sup> AV: 1 T: FTMS + p

ESI d Full ms2

416.2788@hcd30.00

[50.0000-445.0000]

**(25) Nigericin**

$[M+Na]^+$

Mass error: 0.5 ppm

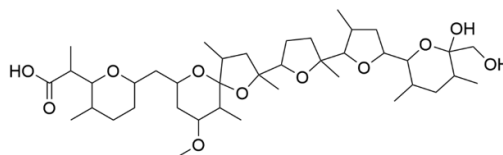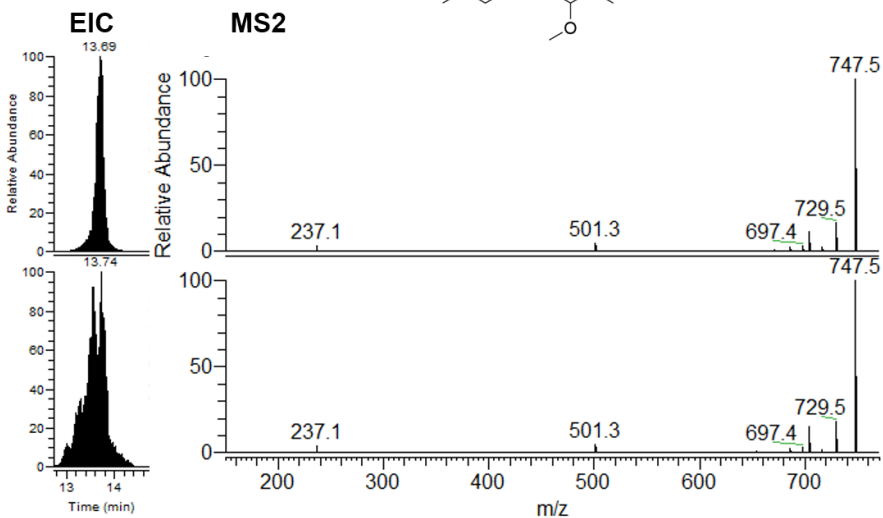

## Standard

NL: 1.28E8

052120\_Std\_Nigericin#5740-5841  
RT: 13.64-13.72 AV: 2 F: FTMS + p  
ESI d Full ms2  
747.4639@hcd30.00  
[50.0000-780.0000]

### Strain P009

NL: 1.98E8

011319 EtAcMS2 P009#7502-

7611 RT: 13.61-13.79 AV: 3 F:

FTMS + p ESI d Full ms2

747.4639@hcd30.00  
[50.00000 700.00000]

[50.0000-780.0000]
