# Supplementary material for: Multiple lineages of Streptomyces produce antimicrobials within passalid beetle galleries across eastern North America
Source: eLife journal article supplement (doi:10.7554/elife.65091), 2021-05-03
Supplement: supp3 [file elife-65091-supp3-v1.pdf]

### (23) Surugamide A

[M+H]<sup>+</sup>

Mass error: 2.0 ppm

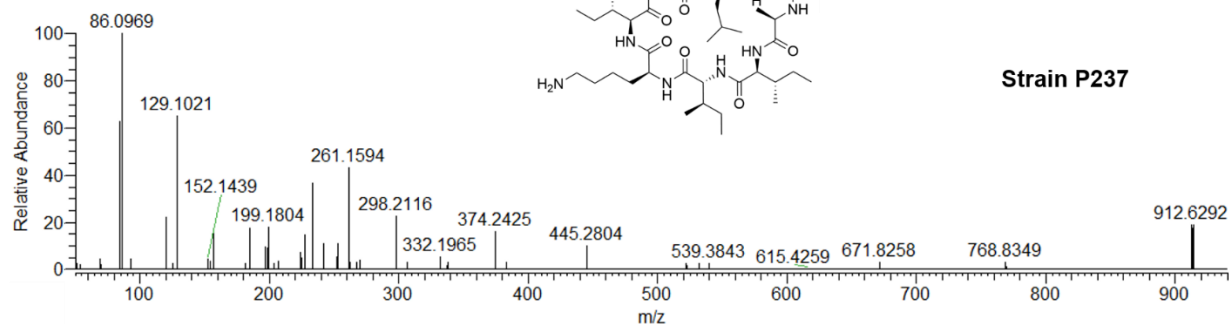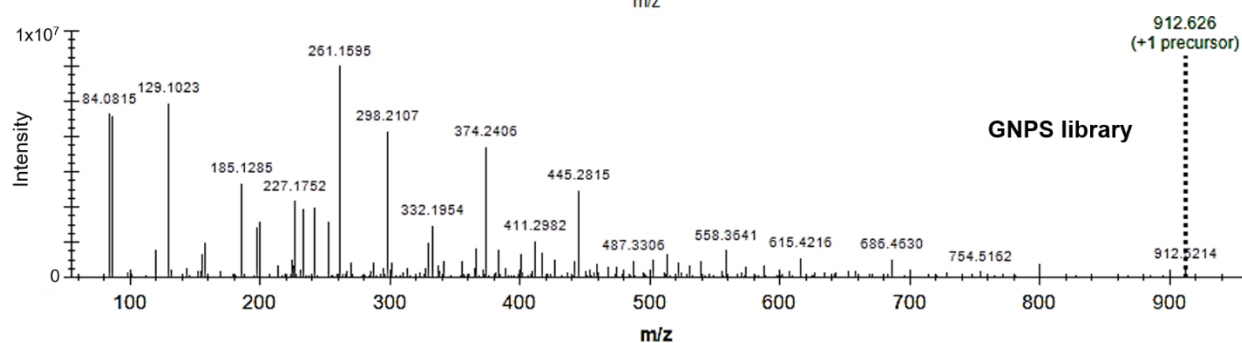

**Supplementary File 3:** MS2 spectra of each compound annotated at identification level 2 (Alteramide A, Alteramide B, Surugamide A), comparing a spectrum detected in the culture extract of an exemplary microbe (top) to a publicly available spectrum on the MassIVE repository (bottom). Publicly available spectra can be found at: Alteramide A, Alteramide B: f.MSV000079516/ccms\_peak/Labelled/R5\_lab\_J1074\_pre.mzXML; Surugamide A: f.MSV000079519/ccms\_peak/Unlabelled/A1\_unlab\_J1074\_pre.mzXML (accessed on June/2020).
