# Supplementary material for: Multiple lineages of Streptomyces produce antimicrobials within passalid beetle galleries across eastern North America
Source: eLife journal article supplement (doi:10.7554/elife.65091), 2021-05-03
Supplement: supp6 [file elife-65091-supp6-v1.pdf]

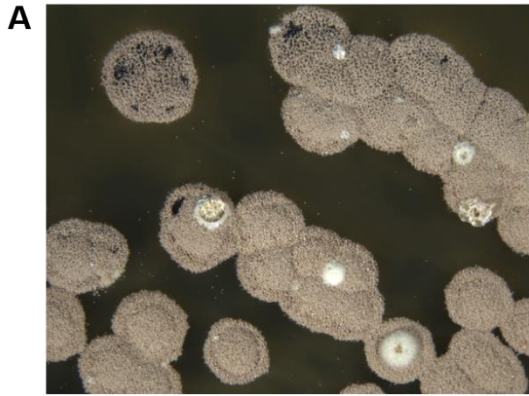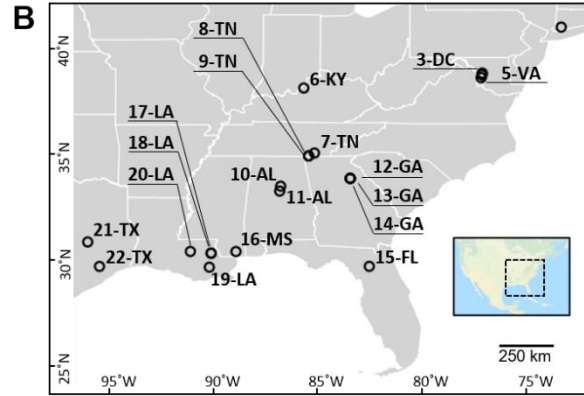

**Supplementary File 6:** Strains of *Streptomyces padanus* were isolated from 19/22 of the sampled *O. disjunctus* galleries. **A)** *S. padanus* P333 growing on an ISP2-agar plate after seven days of incubation at 30°C. **B)** Galleries that *S. padanus* was isolated from.
