# Supplementary material for: Multiple lineages of Streptomyces produce antimicrobials within passalid beetle galleries across eastern North America
Source: eLife journal article supplement (doi:10.7554/elife.65091), 2021-05-03
Supplement: supp8 [file elife-65091-supp8-v1.pdf]

*Metarhizium anisopliae* P016

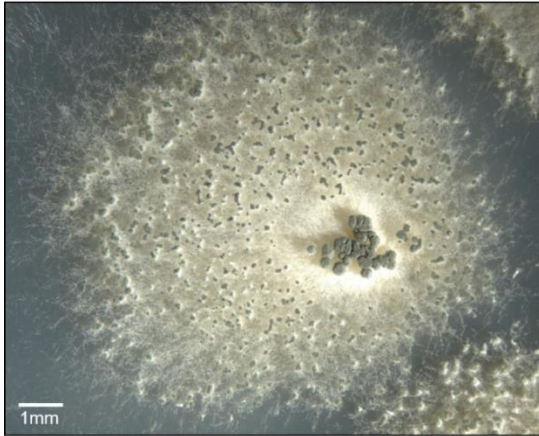

*Metarhizium anisopliae* P287

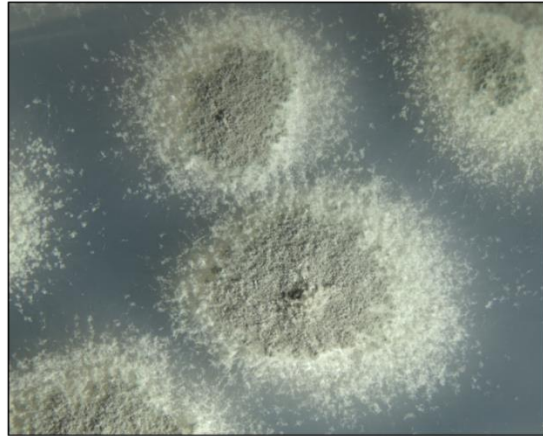

**Supplementary File 8:** *Metarhizium anisopliae* strains P016 and P287 phenotypes after 10 days growing on PDA plates incubated at 25°C under constant light. Magnification: 7x.
