# Supplementary material for: Multiple lineages of Streptomyces produce antimicrobials within passalid beetle galleries across eastern North America
Source: eLife. 2021 May 4;10:e65091. doi: 10.7554/eLife.65091 (PMC8096431; doi:10.7554/eLife.65091)
Supplement: Supplementary file 4. — Annotations were made based on fragmentation similarities with other analogs of the same family annotated at identification level 1 (filipins I–III). [file elife-65091-supp4.pdf]

**(14) Filipin IV**

$[M+Na]^+$

Mass error: 1.0 ppm

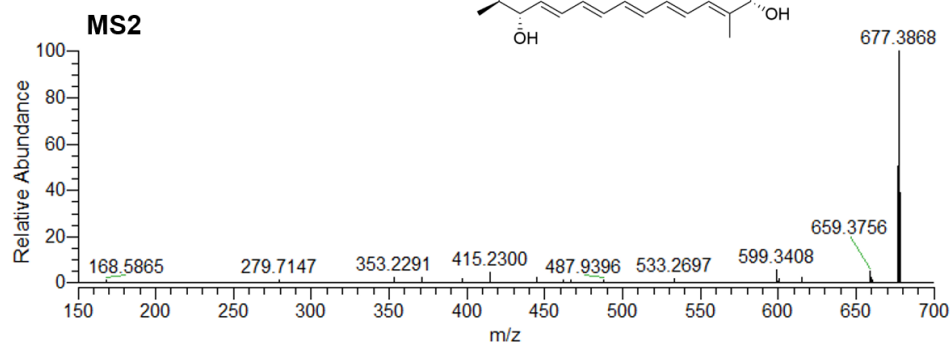

NL: 3.97E5  
021320\_EtAc\_P181#2234-3606  
RT: 4.65-4.82 AV: 3 F: FTMS  
+ p ESI d Full ms2  
677.3864@hcd30.00  
[50.0000-710.0000]

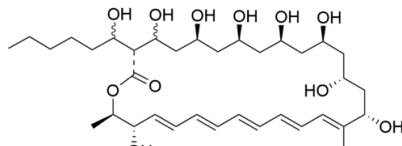

**(15) Fungichromin**

$[M+Na]^+$

Mass error: 2.2 ppm

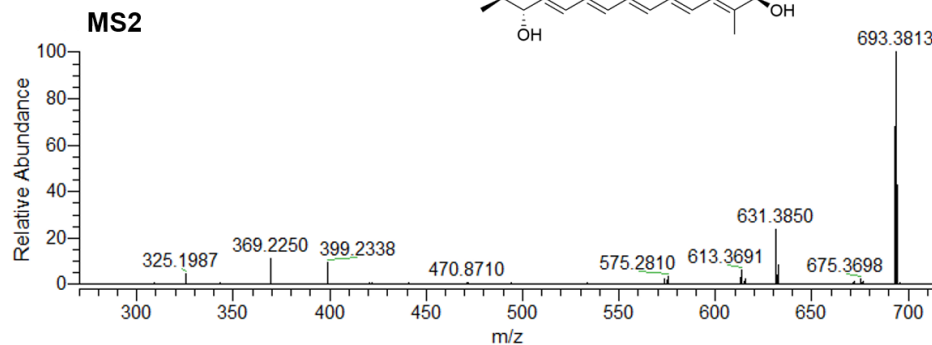

NL: 1.84E6  
021320\_EtAc\_P181#1443-1554  
RT: 3.07-3.17 AV: 2 F: FTMS  
+ p ESI d Full ms2  
693.3824@hcd30.00  
[50.0000-725.0000]

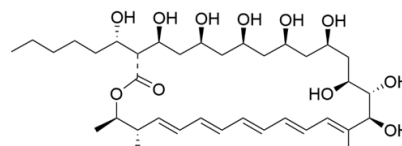

**Supplementary File 4:** MS2 spectrum of each compound putatively annotated at identification level 3 (Filipin IV, Fungichromin), detected in the culture extract of an exemplary microbe. Annotations were made based on fragmentation similarities with other analogs of the same family annotated at identification level 1 (filipins I-III).
